# Supplementary material
Source: PubMed Central journal article supplement (PMC2646168)
Supplement: NIHMS80716-supplement-01.pdf [file NIHMS80716-supplement-01.pdf]

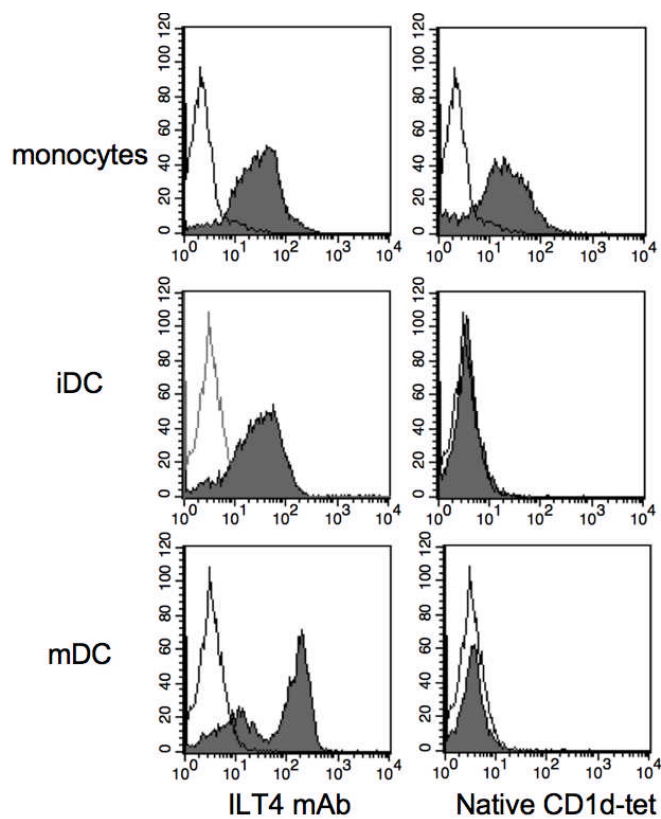

**Supplemental figure 1.** DC staining. Monocyte, immature dendritic cells (iDC), or mature DC (mDC) generated by stimulating iDC with LPS, were stained with ILT4 mAb or native CD1d tetramer and analysed by FACS.
